# Supplementary material for: Trends in Use of Robotic Surgery for Privately Insured Patients and Medicare Fee-for-Service Beneficiaries
Source: PubMed Central journal article supplement (PMC10209745; doi:10.1001/jamanetworkopen.2023.15052), 2023-05-24
Supplement: jamanetwopen-e2315052-s002.pdf [file jamanetwopen-e2315052-s002.pdf]

## Data Sharing Statement

Bonner. Trends in Use of Robotic Surgery for Privately Insured Patients and Medicare Fee-For-Service Beneficiaries. *JAMA Netw Open*. Published May 24, 2023.

doi:10.1001/jamanetworkopen.2023.15052

### Data

**Data available:** No

### Additional Information

**Explanation for why data not available:** Medicare Data is publicly available and de-identified.
